# Supplementary material for: Hepta-coordinated Ni(ii) assemblies – structure and magnetic studies
Source: Royal Society of Chemistry journal article supplement (doi:10.1039/d1dt00479d), 2021-01-01
Supplement: d1dt00479d1.pdf [file d1dt00479d1.pdf]

Supporting Information  
for  
**Hepta-coordinated Ni(II) assemblies - structure and magnetic studies**

Mateusz Reczyński<sup>a</sup>, Mitsuru Akaki<sup>b</sup>, Takamitsu Fukuda<sup>c</sup>, Yuya Sawada<sup>b</sup>, Kengo Nishii<sup>b</sup>,  
Masayuki Hagiwara<sup>b\*</sup>, Wojciech Nitek<sup>a</sup>, Barbara Sieklucka<sup>a</sup>, Beata Nowicka<sup>a,\*</sup>

|                   |                                                                                                             |     |
|-------------------|-------------------------------------------------------------------------------------------------------------|-----|
| <b>Figure S1</b>  | PXRD pattern for <b>1</b> compared with the pattern simulated from SC data                                  | S2  |
| <b>Figure S2</b>  | IR spectra for compounds <b>1-3</b>                                                                         | S2  |
| <b>Figure S3</b>  | PXRD pattern for <b>2</b> compared with the pattern simulated from SC data                                  | S3  |
| <b>Figure S4</b>  | PXRD patterns for <b>3</b> and <b>3s</b> compared with the pattern for <b>3</b> simulated from SC data      | S3  |
| <b>Figure S5</b>  | Thermogravimetric analysis for <b>1-3</b>                                                                   | S3  |
| <b>Figure S6</b>  | The asymmetric unit of <b>1</b>                                                                             | S4  |
| <b>Figure S7</b>  | The $\pi$ - $\pi$ stacking in the structure <b>1</b>                                                        | S4  |
| <b>Figure S8</b>  | Hydrogen bonds in the structure of <b>1</b>                                                                 | S5  |
| <b>Table S1</b>   | Hydrogen-bond geometry in <b>1</b>                                                                          | S5  |
| <b>Figure S9</b>  | The asymmetric unit of <b>2</b>                                                                             | S6  |
| <b>Figure S10</b> | Hydrogen bonds in the structure of <b>2</b>                                                                 | S6  |
| <b>Table S2</b>   | Hydrogen-bond geometry in <b>2</b>                                                                          | S6  |
| <b>Figure S11</b> | The asymmetric unit of <b>3</b>                                                                             | S7  |
| <b>Figure S12</b> | Hydrogen bonds in the structure of <b>3</b>                                                                 | S7  |
| <b>Table S3</b>   | Hydrogen-bond geometry in <b>3</b>                                                                          | S8  |
| <b>Figure S13</b> | Channels filled with disordered crystallisation water in the structure of <b>3</b>                          | S9  |
| <b>Figure S14</b> | Close contacts between terminal CN ligands and pyridine rings of dapsc ligands in the structure of <b>3</b> | S9  |
| <b>Figure S15</b> | $\chi T(T)$ plots in logarithmic scale for compounds <b>1-3</b>                                             | S9  |
| <b>Figure S16</b> | Concomitant fit of the $\chi T(T)$ , $M(H)$ and $M(HT^{-1})$ curves for <b>1</b> and <b>2</b>               | S10 |
| <b>Figure S17</b> | AC magnetic susceptibility in DC field 0 and 1 kOe for <b>1</b> , <b>2</b> and <b>3</b>                     | S11 |
| <b>Figure S18</b> | EPR spectra simulation for <b>2</b>                                                                         | S11 |

|                   |                                                                                                   |     |
|-------------------|---------------------------------------------------------------------------------------------------|-----|
| <b>Table S4</b>   | ZFC parameters for <b>1-3</b> and related heptacoordinated Ni(II) complexes                       | S12 |
| <b>Figure S19</b> | Coordination geometry of <b>3</b> *                                                               | S13 |
| <b>Table S5</b>   | Spin Hamiltonian parameters obtained at the CASSCF and NEVPT2 level <i>ab initio</i> calculations | S13 |
| <b>Table S6</b>   | Wave functions for the ground and first excited states obtained at the QDPT with CASSCF level     | S14 |
| <b>Table S7</b>   | Wave functions for the ground and first excited states obtained at the QDPT with NEVPT2 level     | S14 |

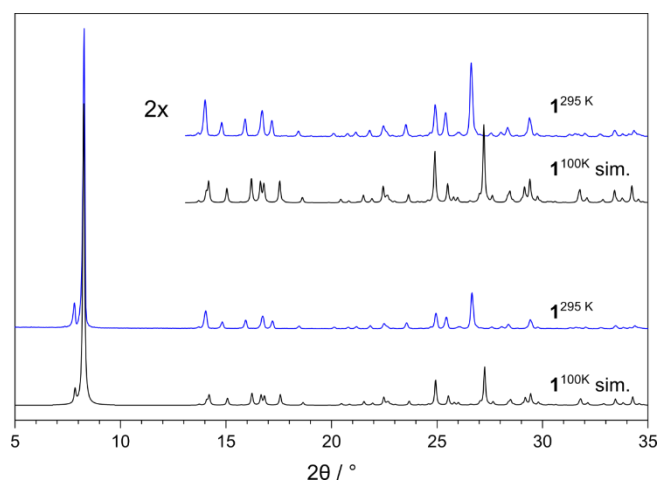

**Figure S1.** The PXRD pattern for **1** compared with the pattern simulated from SC data. A strong texture is observed with preferred (010) orientation for **1**, which was also taken into account for the simulated pattern (March-Dollase parameter = 0.6). The measurement temperatures are denoted in superscript.

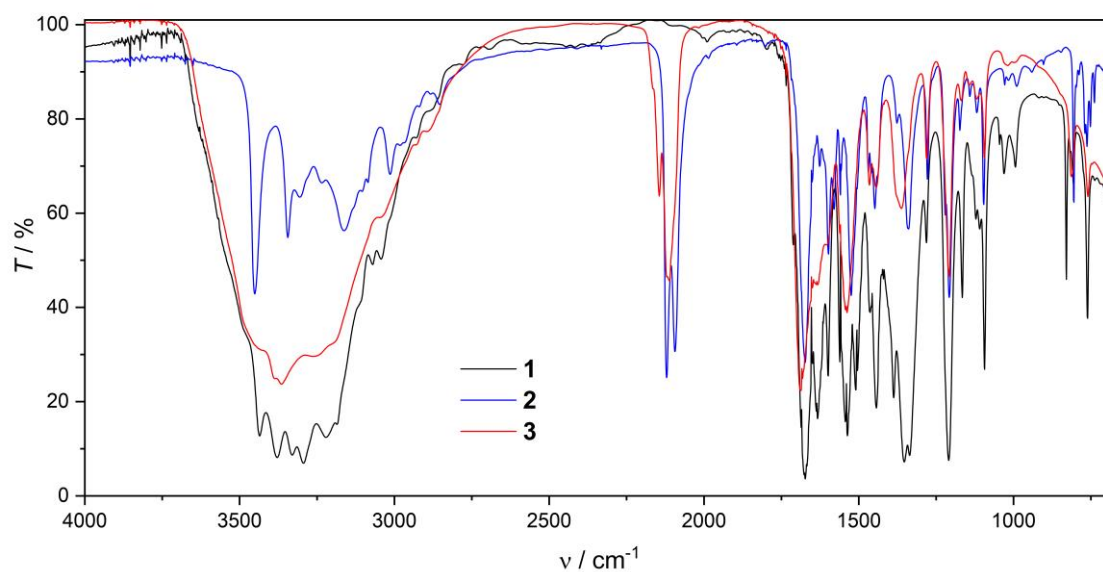

**Figure S2.** IR spectra for compounds **1-3**.

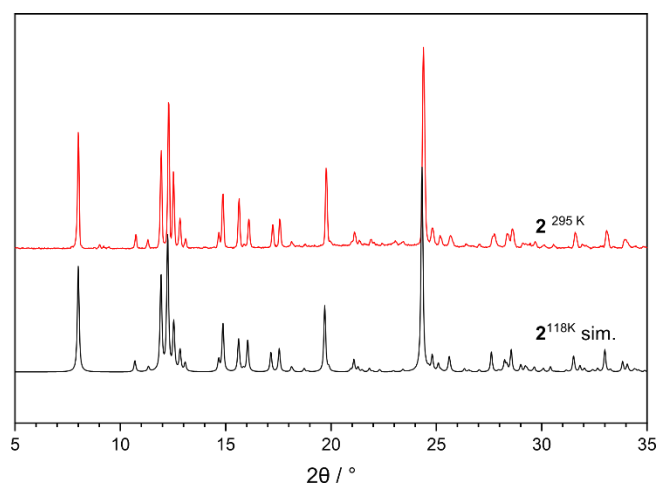

**Figure S3.** The PXRD pattern for **2** compared with the pattern simulated from SC data.

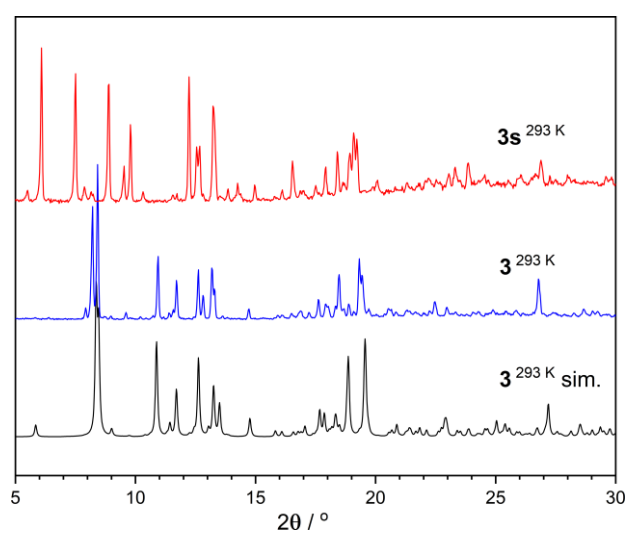

**Figure S4.** The experimental PXRD patterns for **3** and **3s** compared with the pattern for **3** simulated from SC data.

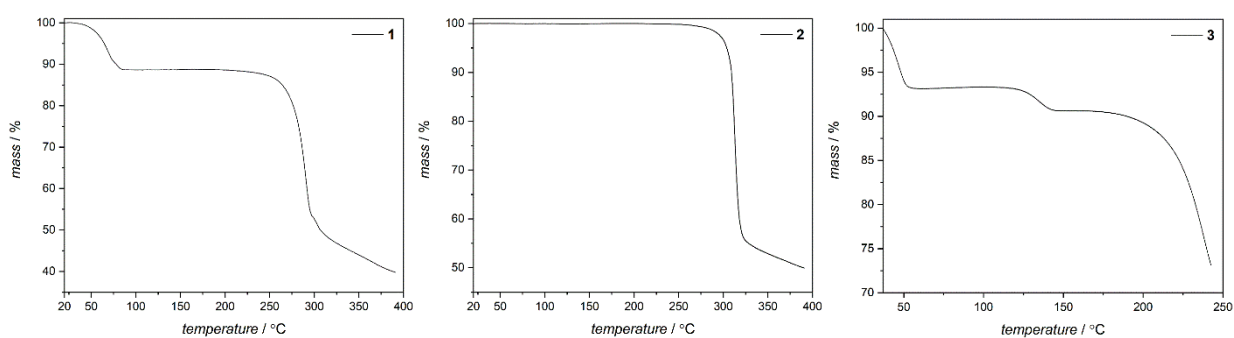

**Figure S5.** Thermogravimetric analysis for **1-3**.

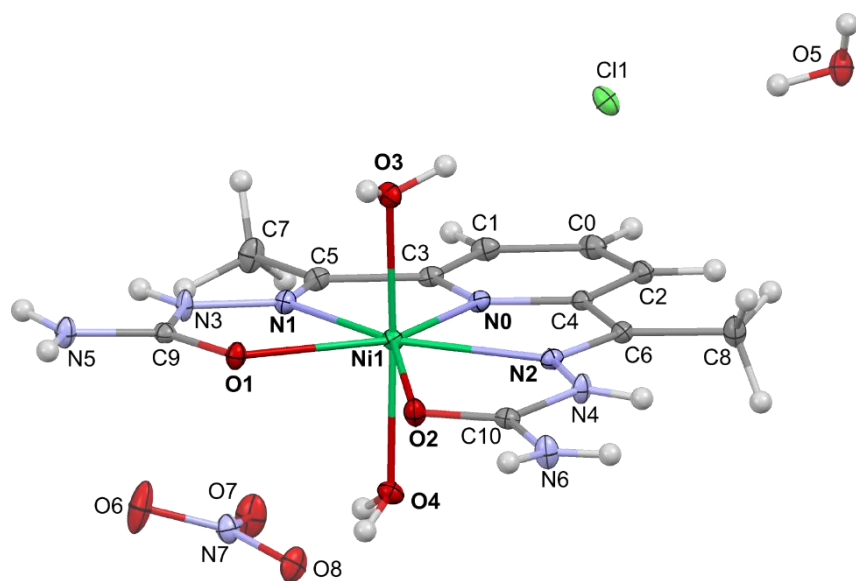

**Figure S6.** The asymmetric unit of **1**; ellipsoids at 50% probability.

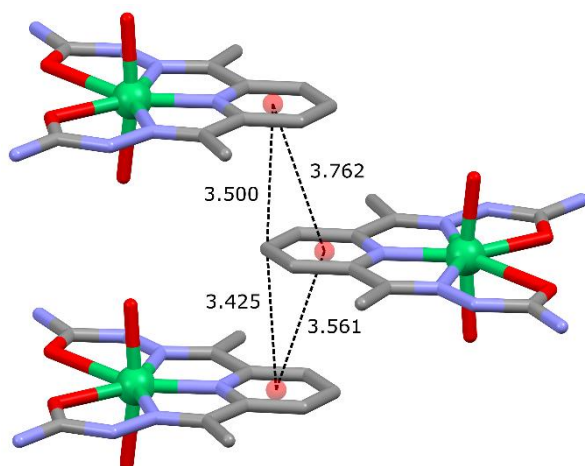

**Figure S7.** The  $\pi$ - $\pi$  stacking in the structure of **1**.

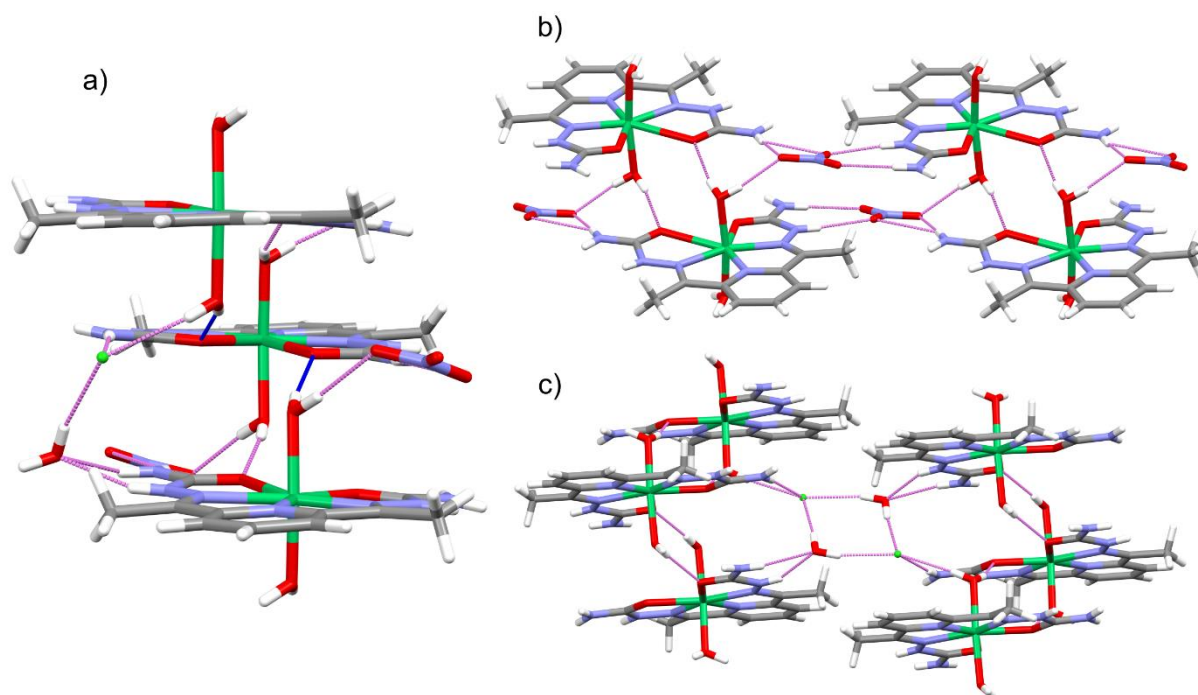

**Figure S8.** Hydrogen bonds in the structure of **1**: (a) direct interactions between the complexes (blue lines show the O-accepted H-bonds of the dapsc ligand); (b) H-bonds mediated by the NO<sub>3</sub><sup>-</sup> anions; (c) H-bonds mediated by the Cl<sup>-</sup> anions and water molecules.

**Table S1.** Hydrogen-bond geometry in **1**

| <i>D</i> —H··· <i>A</i>       | <i>D</i> —H / Å | H··· <i>A</i> / Å | <i>D</i> ··· <i>A</i> / Å | <i>D</i> —H··· <i>A</i> / ° |
|-------------------------------|-----------------|-------------------|---------------------------|-----------------------------|
| N3—H3···O6 <sup>ii</sup>      | 0.81(2)         | 2.13(2)           | 2.9330(15)                | 174.5(18)                   |
| O3—H3A···O1 <sup>v</sup>      | 0.79(2)         | 2.05(2)           | 2.8192(13)                | 164(2)                      |
| O3—H3B···Cl1                  | 0.82(2)         | 2.29(2)           | 3.1034(10)                | 170(2)                      |
| N4—H4···O5 <sup>vi</sup>      | 0.815(19)       | 2.038(19)         | 2.8006(16)                | 155.6(17)                   |
| O4—H4A···O8                   | 0.82(2)         | 1.99(2)           | 2.7995(14)                | 173(2)                      |
| O4—H4B···O2 <sup>vii</sup>    | 0.81(2)         | 1.97(2)           | 2.7761(14)                | 169(2)                      |
| N5—H5A···O7 <sup>ii</sup>     | 0.83(2)         | 2.18(2)           | 3.0038(16)                | 175.2(18)                   |
| N5—H5B···Cl1 <sup>v</sup>     | 0.87(2)         | 2.40(2)           | 3.2519(12)                | 169.7(17)                   |
| N6—H6A···O6 <sup>vii</sup>    | 0.84(2)         | 2.521(19)         | 3.1025(16)                | 127.2(15)                   |
| N6—H6A···O8 <sup>vii</sup>    | 0.84(2)         | 2.30(2)           | 3.1358(16)                | 174.8(17)                   |
| N6—H6B···O5 <sup>vi</sup>     | 0.83(2)         | 2.30(2)           | 3.0109(16)                | 144.3(18)                   |
| O5—H1WA···Cl1                 | 0.86(2)         | 2.27(2)           | 3.1132(11)                | 168(2)                      |
| O5—H1WB···Cl1 <sup>viii</sup> | 0.80(3)         | 2.37(3)           | 3.1514(12)                | 167(2)                      |

Symmetry codes: (i)  $-x+1, -y+1, -z$ ; (ii)  $-x+1, -y+2, -z+1$ ; (iii)  $-x, -y+1, -z$ ; (iv)  $x-1, y, z$ ; (v)  $-x+1, -y+1, -z+1$ ; (vi)  $-x, -y, -z$ ; (vii)  $-x, -y+1, -z+1$ ; (viii)  $-x+1, -y, -z$ .

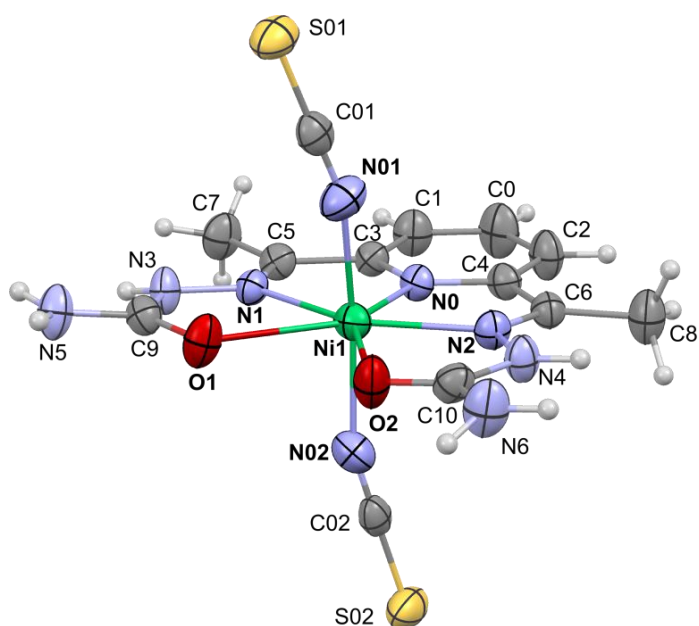

**Figure S9.** The asymmetric unit of **2**; ellipsoids at 50% probability.

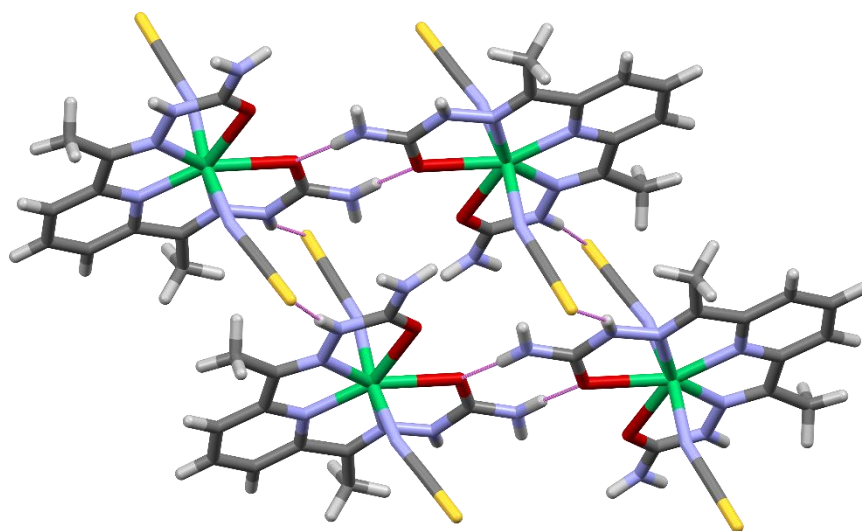

**Figure S10.** Hydrogen bonds in the structure of **2**.

**Table S2.** Hydrogen-bond geometry in **2**

| $D-H\cdots A$                     | $D-H / \text{\AA}$ | $H\cdots A / \text{\AA}$ | $D\cdots A / \text{\AA}$ | $D-H\cdots A / ^\circ$ |
|-----------------------------------|--------------------|--------------------------|--------------------------|------------------------|
| N4—H4 $\cdots$ S01 <sup>ii</sup>  | 0.87               | 2.5                      | 3.343(3)                 | 164                    |
| N3—H3 $\cdots$ S02 <sup>iii</sup> | 0.87               | 2.53                     | 3.370(3)                 | 163                    |
| N6—H6A $\cdots$ N02 <sup>iv</sup> | 0.87               | 2.65                     | 3.483(5)                 | 160                    |
| N6—H6B $\cdots$ S01 <sup>ii</sup> | 0.87               | 2.85                     | 3.629(4)                 | 150                    |
| N5—H5A $\cdots$ O1 <sup>v</sup>   | 0.87               | 2.13                     | 2.966(4)                 | 159                    |
| N5—H5A $\cdots$ O2 <sup>v</sup>   | 0.87               | 2.52                     | 3.013(4)                 | 116                    |

Symmetry codes: (i)  $x, -y+1/2, z-1/2$ ; (ii)  $x+1, y, z$ ; (iii)  $x-1, y, z$ ; (iv)  $-x+2, -y+1, -z+2$ ; (v)  $-x+1,$

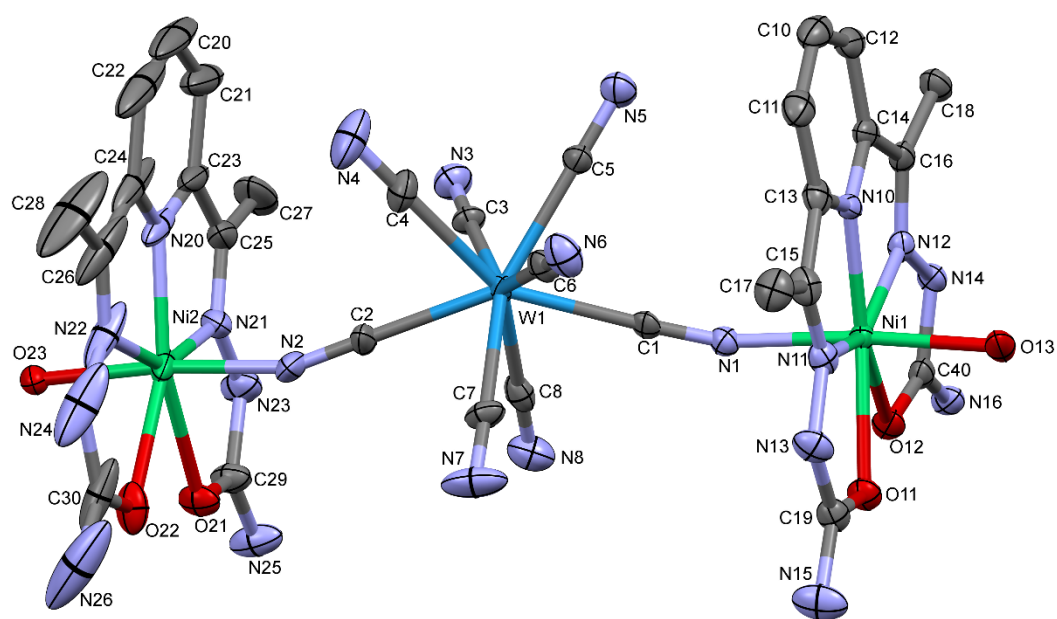

**Figure S11.** The asymmetric unit of **3**; H atoms and disordered water molecules omitted for clarity; ellipsoids at 50% probability.

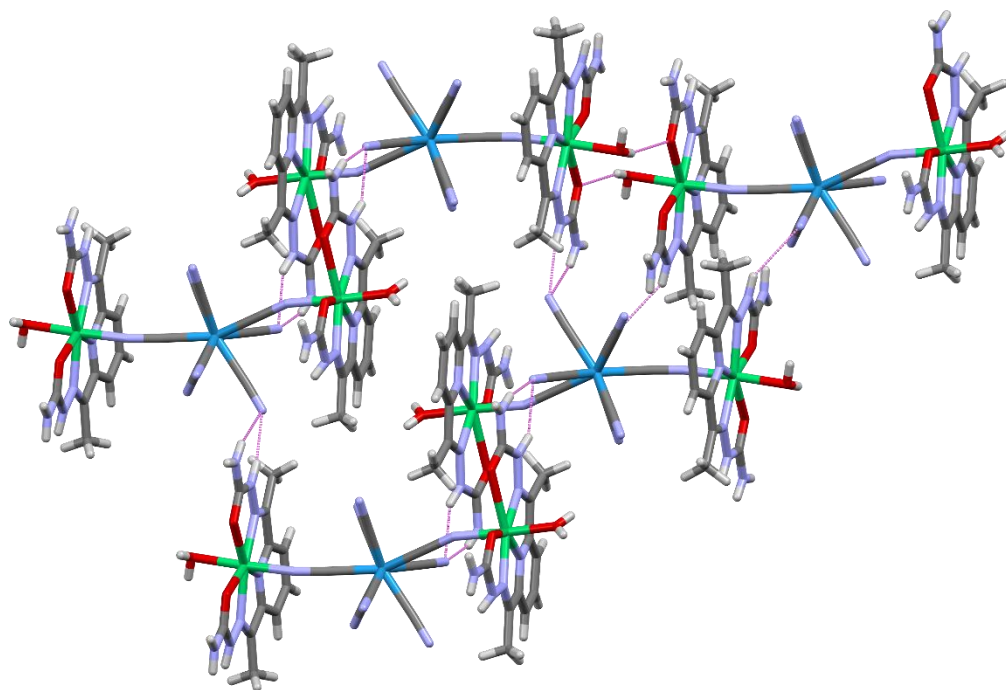

**Figure S12.** Direct hydrogen bonds linking trinuclear molecules in the (0 2 2) planes in the structure of **3**.

**Table S3.** Hydrogen-bond geometry in **3**

| $D-H\cdots A$                         | $D-H / \text{\AA}$ | $H\cdots A / \text{\AA}$ | $D\cdots A / \text{\AA}$ | $D-H\cdots A / ^\circ$ |
|---------------------------------------|--------------------|--------------------------|--------------------------|------------------------|
| N15—H15A $\cdots$ O7W                 | 0.66               | 2.52                     | 3.110 (8)                | 149                    |
| N15—H15B $\cdots$ N7 <sup>iii</sup>   | 0.86               | 2.39                     | 3.154 (8)                | 149                    |
| N16—H16A $\cdots$ O1W <sup>i</sup>    | 0.73               | 2.31                     | 3.004 (6)                | 159                    |
| N16—H16B $\cdots$ N5 <sup>i</sup>     | 0.87               | 2.11                     | 2.921 (6)                | 155                    |
| N25—H25A $\cdots$ N6 <sup>iv</sup>    | 0.77               | 2.49                     | 3.162 (7)                | 146                    |
| N25—H25B $\cdots$ O1W <sup>v</sup>    | 0.93               | 2.43                     | 3.329 (6)                | 163                    |
| N25—H25B $\cdots$ O2W <sup>v</sup>    | 0.93               | 2.59                     | 3.271 (6)                | 131                    |
| N26—H26A $\cdots$ O6W <sup>v</sup>    | 0.86               | 2.40                     | 3.200 (13)               | 156                    |
| O13—H13A $\cdots$ O5W <sup>vi</sup>   | 0.75               | 1.99                     | 2.735 (6)                | 178                    |
| O13—H13B $\cdots$ O9W <sup>vi</sup>   | 0.74               | 1.93                     | 2.672 (5)                | 173                    |
| O23—H23A $\cdots$ N22                 | 0.85               | 2.64                     | 3.049 (6)                | 111                    |
| O23—H23A $\cdots$ O1W <sup>vii</sup>  | 0.85               | 1.88                     | 2.667 (5)                | 152                    |
| O23—H23B $\cdots$ O21 <sup>viii</sup> | 0.73               | 2.08                     | 2.770 (5)                | 157                    |
| O1W—H1WA $\cdots$ O4W                 | 0.85               | 1.93                     | 2.761 (6)                | 167                    |
| O1W—H1WB $\cdots$ O2W                 | 0.86               | 1.95                     | 2.718 (6)                | 149                    |
| O2W—H2WA $\cdots$ O11 <sup>i</sup>    | 0.78               | 2.06                     | 2.802 (5)                | 159                    |
| O2W—H2WA $\cdots$ O12 <sup>i</sup>    | 0.78               | 2.49                     | 3.002 (5)                | 125                    |
| O2W—H2WB $\cdots$ N7 <sup>ix</sup>    | 0.87               | 1.97                     | 2.836 (7)                | 173                    |
| N13—H13 $\cdots$ O7W                  | 0.69 (7)           | 2.14 (8)                 | 2.792 (7)                | 161 (8)                |
| N14—H14 $\cdots$ N5 <sup>i</sup>      | 0.92 (6)           | 2.22 (6)                 | 3.025 (6)                | 145 (5)                |
| N23—H23 $\cdots$ N6 <sup>iv</sup>     | 0.85 (7)           | 2.04 (7)                 | 2.845 (7)                | 159 (6)                |
| N24—H24 $\cdots$ N7 <sup>ii</sup>     | 0.81 (11)          | 2.63 (11)                | 3.318 (10)               | 144 (10)               |
| N24—H24 $\cdots$ O11W <sup>ii</sup>   | 0.81 (11)          | 2.41 (11)                | 3.106 (10)               | 145 (10)               |

Symmetry codes: (i)  $-x, -y+1, -z$ ; (ii)  $-x, -y, -z+1$ ; (iii)  $-x, -y, -z$ ; (iv)  $x-1, y, z$ ; (v)  $x-1, y-1, z$ ; (vi)  $-x+1, -y+1, -z$ ; (vii)  $-x, -y+1, -z+1$ ; (viii)  $-x-1, -y, -z+1$ ; (ix)  $x, y+1, z$ .



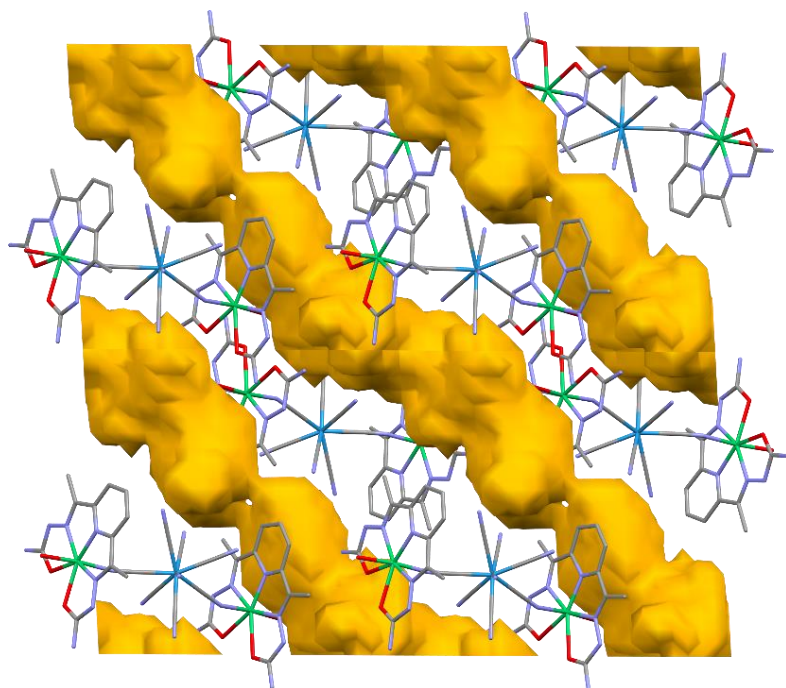

**Figure S13.** Channels filled with disordered crystallisation water in the structure of **3**.

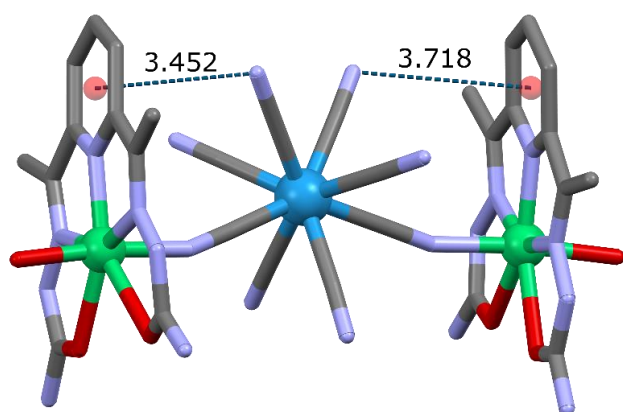

**Figure S14.** Close contacts between terminal CN ligands and pyridine rings of dapsac ligands in the structure of **3**.

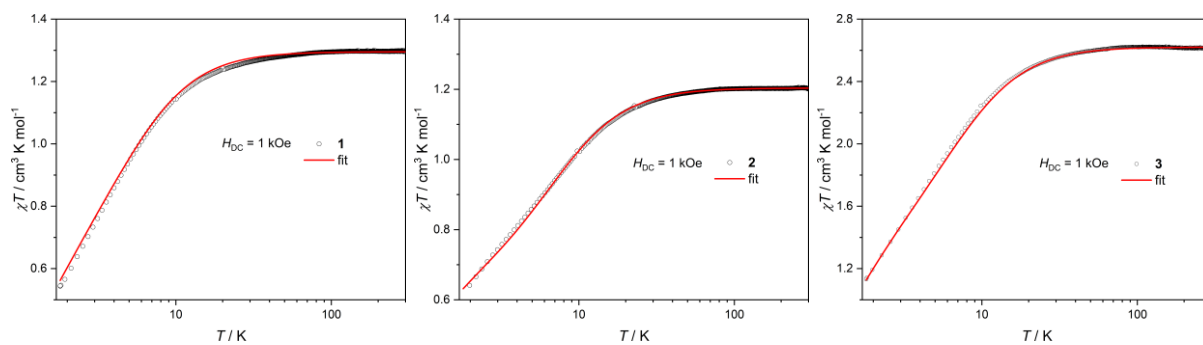

**Figure S15.**  $\chi T(T)$  plots in logarithmic scale for compounds **1-3**.

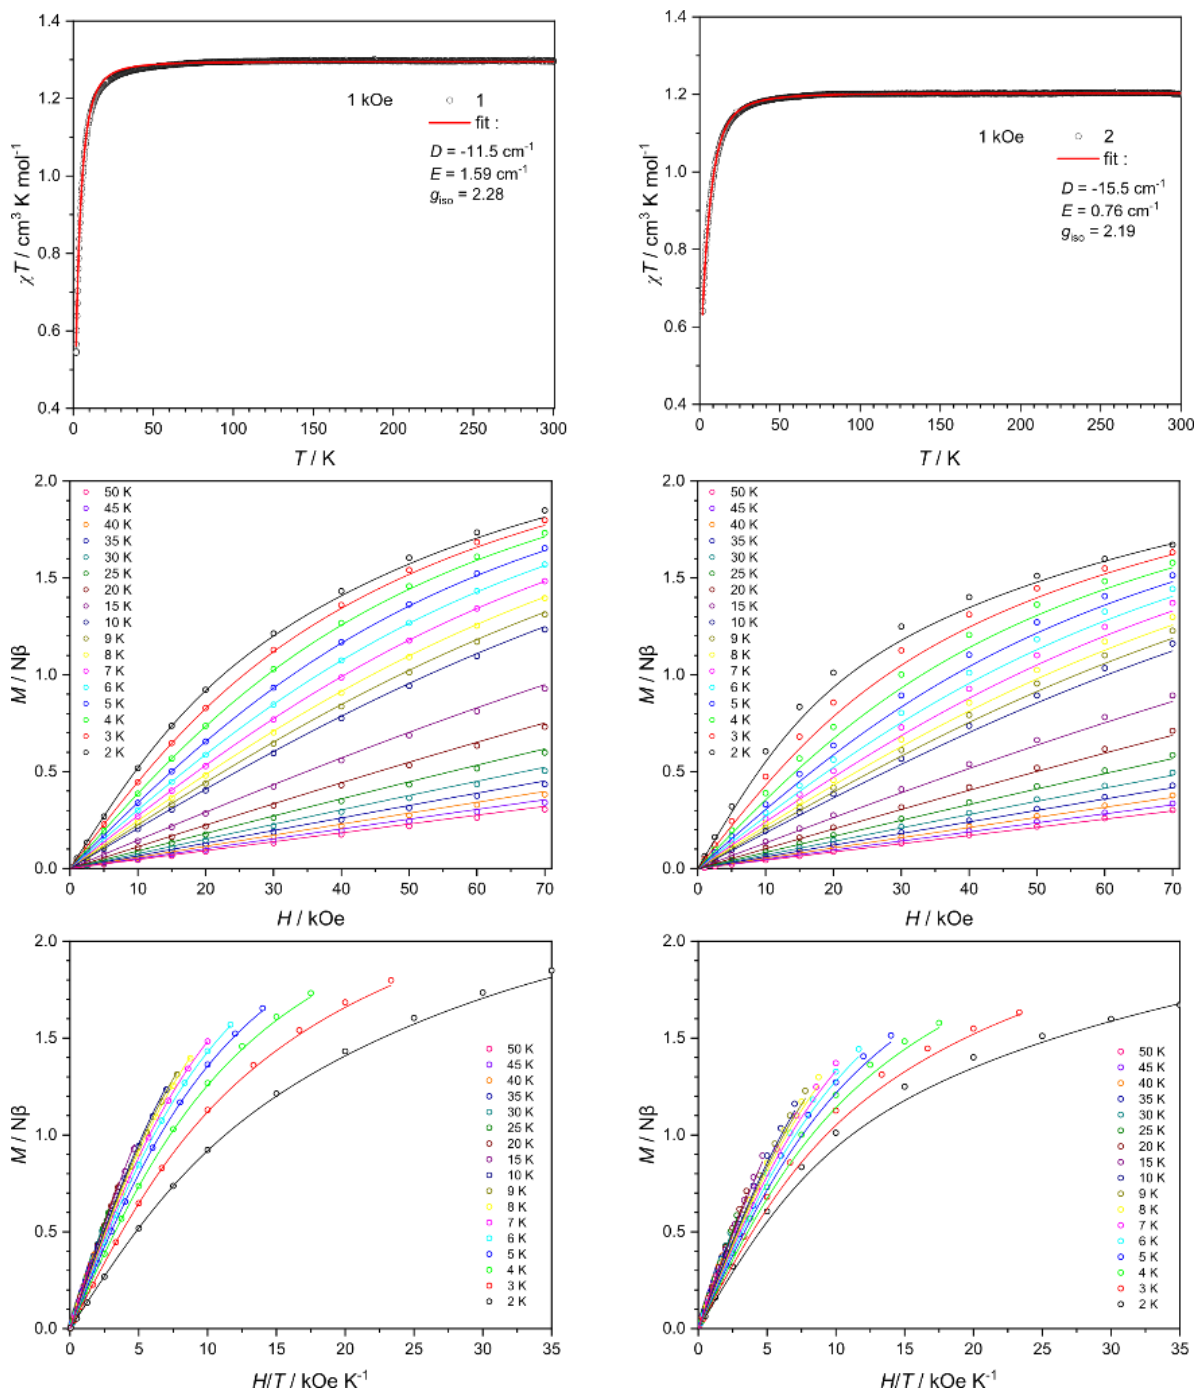

**Figure S16.** Concomitant fit of the  $\chi T(T)$  (top),  $M(H)$  (centre) and  $M(HT^{-1})$  (bottom) curves for **1** (left) and **2** (right).

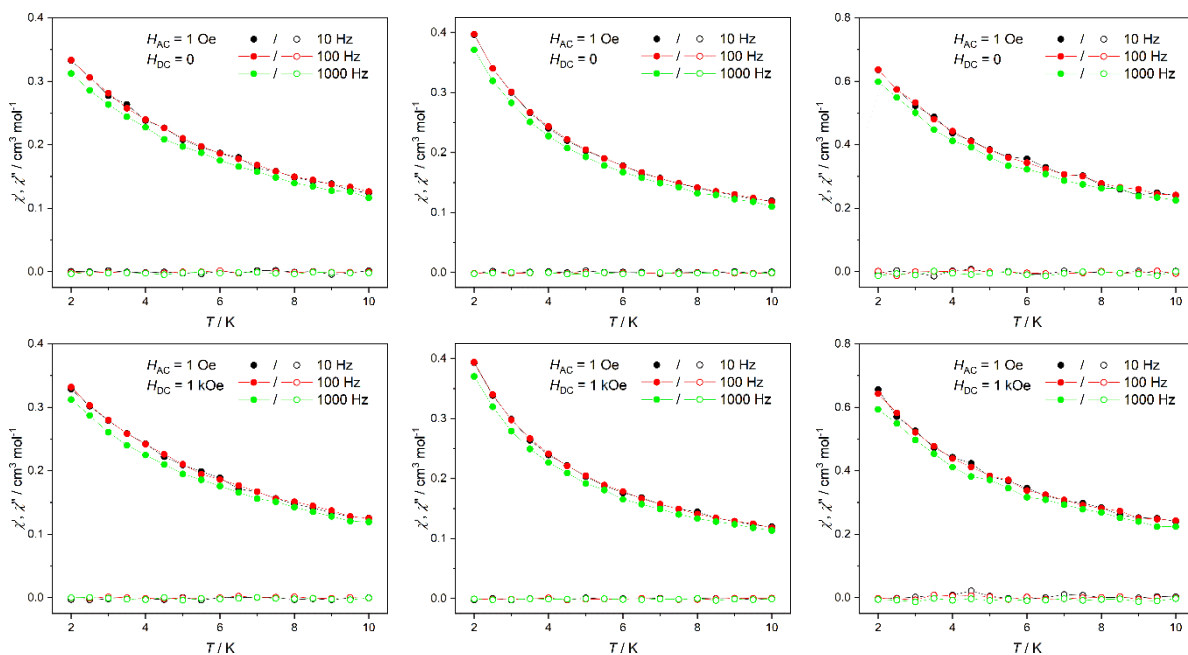

**Figure S17.** AC magnetic susceptibility in DC field 0 (top) and 1 kOe (bottom) for **1** (left), **2** (centre) and **3** (right);  $\chi'$  - filled circles,  $\chi''$  - empty circles.

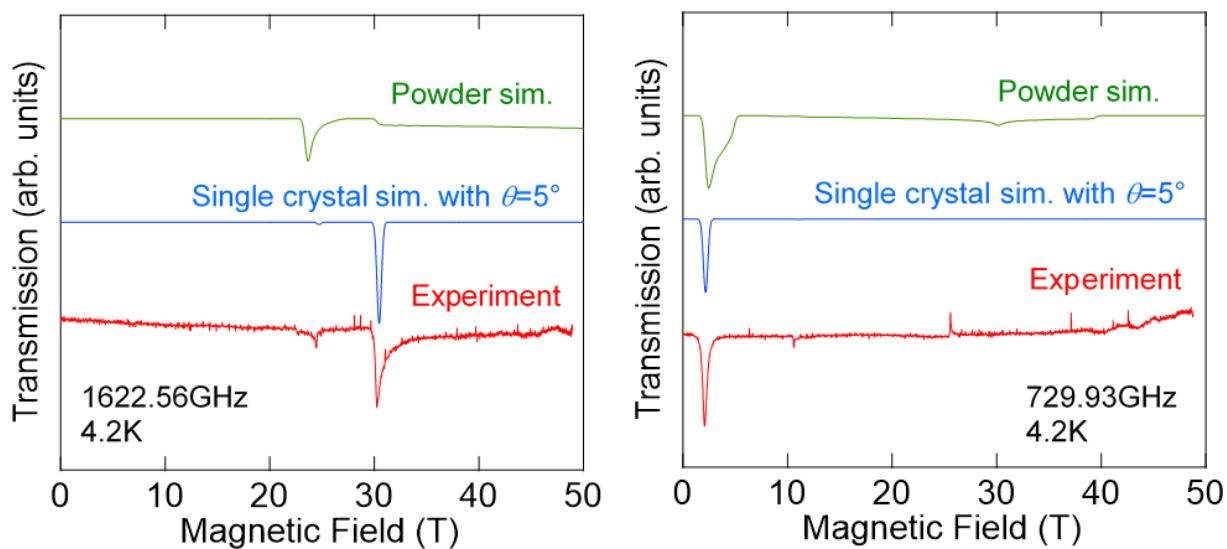

**Figure S18.** Simulation patterns of the EPR spectra at 4.2 K for the frequencies of 1622.56 GHz (left) and 729.93 GHz (right) corresponding to the spectra of **2**. The absorption width of 500 mT is used in each simulation. The upper and lower simulation patterns represent those for powder and single crystal with the deviation angle of the external magnetic field from the  $z$ -axis,  $\theta=5^\circ$ . The lowest line is the experimentally observed EPR spectra.

**Table S4.** ZFC parameters for **1**, **2** and **3** in comparison with literature data for related heptacoordinate Ni(II) complexes. Values obtained from magnetometric studies ( $M(H)$  fit or concomitant  $M(H)$  and  $\chi T(T)$  fit) and/or **HF-EPR** (marked in blue bold print)

| Reference | Compound                                                                                                                        | $D / \text{cm}^{-1}$ | $ E/D $     | $g$         |
|-----------|---------------------------------------------------------------------------------------------------------------------------------|----------------------|-------------|-------------|
| this work | [Ni(dapsc)(H <sub>2</sub> O) <sub>2</sub> ]Cl(NO <sub>3</sub> )·H <sub>2</sub> O ( <b>1</b> )                                   | -11.5                | 0.14        | 2.275       |
|           |                                                                                                                                 | <b>-10.5</b>         | <b>0.27</b> |             |
|           | [Ni(dapsc)(NCS) <sub>2</sub> ] ( <b>2</b> )                                                                                     | -15.5                | 0.05        | 2.193       |
|           |                                                                                                                                 | <b>-21.2</b>         | <b>0.10</b> | <b>2.14</b> |
|           | [Ni(dapsc)(H <sub>2</sub> O) <sub>2</sub> ][W <sup>IV</sup> (CN) <sub>8</sub> ]·11H <sub>2</sub> O ( <b>3</b> )                 | -15.4                | 0.09        | 2.290       |
|           |                                                                                                                                 | <b>-15.0</b>         | <b>0.13</b> | <b>2.29</b> |
| 19        | [Ni(dapsc)(H <sub>2</sub> O) <sub>2</sub> ](NO <sub>3</sub> ) <sub>2</sub> ·H <sub>2</sub> O                                    | -12.5                | 0.14        | 2.26        |
|           |                                                                                                                                 | <b>-15.6</b>         | <b>0.12</b> | <b>2.23</b> |
| 44        | [Ni(dapsc)(NCS) <sub>2</sub> ]·2H <sub>2</sub> O                                                                                | -11.5                | 0.14        |             |
| 44        | [Ni(dapsc)(imidazole) <sub>2</sub> ](NO <sub>3</sub> ) <sub>2</sub> ·H <sub>2</sub> O                                           | -28.2                | 0.06        |             |
| 20        | [Ni(L <sup>1</sup> )(H <sub>2</sub> O) <sub>2</sub> ](NO <sub>3</sub> ) <sub>2</sub> ·H <sub>2</sub> O                          | -13.9*               | 0.11        | 2.26        |
| 44        | [Ni(L <sup>1</sup> )(NCS) <sub>2</sub> ]·3H <sub>2</sub> O                                                                      | -12.4                | 0.12        |             |
| 19        | {[Ni(L <sup>1</sup> )]Ni(CN) <sub>4</sub> } <sub>∞</sub>                                                                        | -17.7                | 0.06        | 2.18        |
| 40        | {[Ni(L <sup>1</sup> ) <sub>3</sub> W <sup>V</sup> (CN) <sub>8</sub> ](H <sub>2</sub> O) <sub>2</sub> }·2MeCN·12H <sub>2</sub> O | -15                  |             | 2.16        |
| 40        | [Ni(L <sup>2</sup> )(MeOH)(NO <sub>3</sub> )](NO <sub>3</sub> )                                                                 | -12.5                | 0.09        | 2.22        |
| 40        | {[Ni(L <sup>2</sup> ) <sub>3</sub> W <sup>V</sup> (CN) <sub>8</sub> ](H <sub>2</sub> O) <sub>2</sub> }·2MeCN·9H <sub>2</sub> O  | -5.0                 |             | 2.17        |
| 41        | [Ni(L <sup>3</sup> )](ClO <sub>4</sub> ) <sub>2</sub> ·1.5CH <sub>3</sub> NO <sub>2</sub>                                       | -17.2                | 0.076       | 2.165       |
| 42        | [Ni(L <sup>4</sup> )]·H <sub>2</sub> O                                                                                          | -8.5                 | 0.19        | 2.20        |
| 43        | [Ni(L <sup>5</sup> )](ClO <sub>4</sub> ) <sub>2</sub>                                                                           | -12.8                | 0.136       | 2.181       |

L<sup>1</sup> and L<sup>2</sup> are dapsc derivatives with -NH<sub>2</sub> groups substituted by phenyl (L<sup>1</sup>) or 4-biphenyl (L<sup>2</sup>)

L<sup>3</sup> = 3,12-bis((1H-benzimidazol-2-yl)methyl)-6,9-dioxo-3,12,18-triazabicyclo[12.3.1]octadeca-1(18),14,16-triene)

L<sup>4</sup> = 3,12,18-triaza-6,9-dioxabicyclo[12.3.1]octadeca-1,14,16-triene-3,12-diacetic acid

L<sup>5</sup> = 3,12-bis(2-methylpyridine)-3,12,18-triaza-6,9-dioxabicyclo[12.3.1]octadeca-1,14,16-triene

\* - values found consistent with HF-EPR results

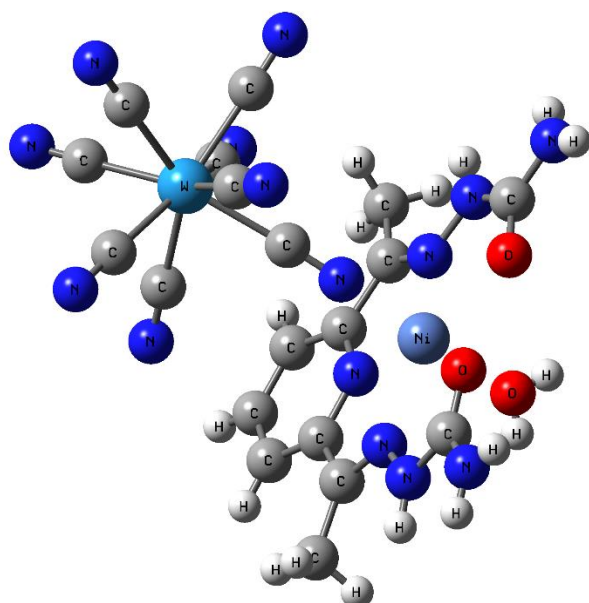

**Figure S19.** Coordination geometry used for the calculations of **3\***.

**Table S5.** Spin Hamiltonian parameters at the CASSCF and NEVPT2 level *ab initio* calculations

| comp-<br>ound |                      | QDPT with CASSCF                          |                          | QDPT with NEVPT2                          |                          |
|---------------|----------------------|-------------------------------------------|--------------------------|-------------------------------------------|--------------------------|
|               |                      | 2 <sup>nd</sup> order SOC<br>contribution | Effective<br>Hamiltonian | 2 <sup>nd</sup> order SOC<br>contribution | Effective<br>Hamiltonian |
| <b>1</b>      | $D / \text{cm}^{-1}$ | -21.6                                     | -19.4                    | -19.5                                     | -17.8                    |
|               | $ E/D $              | 0.21                                      | 0.20                     | 0.21                                      | 0.20                     |
|               | $g_x$ ,              | 2.277                                     |                          | 2.257                                     |                          |
|               | $g_y$                | 2.327                                     |                          | 2.301                                     |                          |
|               | $g_z$                | 2.419                                     |                          | 2.385                                     |                          |
|               | $g_{\text{iso}}$     | 2.341                                     |                          | 2.315                                     |                          |
| <b>2</b>      | $D / \text{cm}^{-1}$ | -41.5                                     | -35.4                    | -37.9                                     | -32.8                    |
|               | $ E/D $              | 0.04                                      | 0.03                     | 0.04                                      | 0.03                     |
|               | $g_x$ ,              | 2.279                                     |                          | 2.261                                     |                          |
|               | $g_y$                | 2.296                                     |                          | 2.276                                     |                          |
|               | $g_z$                | 2.514                                     |                          | 2.477                                     |                          |
|               | $g_{\text{iso}}$     | 2.363                                     |                          | 2.338                                     |                          |
| <b>3*</b>     | $D / \text{cm}^{-1}$ | -25.0                                     | -21.7                    | -22.4                                     | -19.8                    |
|               | $ E/D $              | 0.09                                      | 0.09                     | 0.09                                      | 0.08                     |
|               | $g_x$ ,              | 2.273                                     |                          | 2.254                                     |                          |
|               | $g_y$                | 2.297                                     |                          | 2.275                                     |                          |
|               | $g_z$                | 2.424                                     |                          | 2.391                                     |                          |
|               | $g_{\text{iso}}$     | 2.331                                     |                          | 2.306                                     |                          |

**Table S6.** Wave functions for the ground and first excited states obtained at the QDPT with CASSCF level

| compound | state # | energy / $\text{cm}^{-1}$ | weight | spin | $M_S$ |
|----------|---------|---------------------------|--------|------|-------|
| <b>1</b> | 0       | 0.00                      | 0.49   | 1    | +1    |
|          |         |                           | 0.49   | 1    | -1    |
|          | 1       | 7.88                      | 0.49   | 1    | +1    |
|          |         |                           | 0.49   | 1    | -1    |
|          | 2       | 23.35                     | 0.99   | 1    | 0     |

|          |   |       |      |   |    |
|----------|---|-------|------|---|----|
| <b>2</b> | 0 | 0.00  | 0.49 | 1 | +1 |
|          |   |       | 0.49 | 1 | -1 |
|          | 1 | 2.39  | 0.49 | 1 | +1 |
|          |   |       | 0.49 | 1 | -1 |
|          | 2 | 36.60 | 0.99 | 1 | 0  |

|           |   |       |      |   |    |
|-----------|---|-------|------|---|----|
| <b>3*</b> | 0 | 0.00  | 0.49 | 1 | +1 |
|           |   |       | 0.49 | 1 | -1 |
|           | 1 | 3.75  | 0.49 | 1 | +1 |
|           |   |       | 0.49 | 1 | -1 |
|           | 2 | 23.60 | 0.99 | 1 | 0  |

**Table S7.** Wave functions for the ground and first excited states obtained at the QDPT with NEVPT2 level

| compound | state # | energy / $\text{cm}^{-1}$ | weight | spin | $M_S$ |
|----------|---------|---------------------------|--------|------|-------|
| <b>1</b> | 0       | 0.00                      | 0.49   | 1    | +1    |
|          |         |                           | 0.49   | 1    | -1    |
|          | 1       | 7.14                      | 0.49   | 1    | +1    |
|          |         |                           | 0.49   | 1    | -1    |
|          | 2       | 21.33                     | 0.99   | 1    | 0     |

|          |   |       |      |   |    |
|----------|---|-------|------|---|----|
| <b>2</b> | 0 | 0.00  | 0.49 | 1 | +1 |
|          |   |       | 0.49 | 1 | -1 |
|          | 1 | 2.15  | 0.49 | 1 | +1 |
|          |   |       | 0.49 | 1 | -1 |
|          | 2 | 33.90 | 0.99 | 1 | 0  |

|           |   |       |      |   |    |
|-----------|---|-------|------|---|----|
| <b>3*</b> | 0 | 0.00  | 0.49 | 1 | +1 |
|           |   |       | 0.49 | 1 | -1 |
|           | 1 | 3.28  | 0.49 | 1 | +1 |
|           |   |       | 0.49 | 1 | -1 |
|           | 2 | 21.42 | 0.99 | 1 | 0  |
